# Supplementary material for: Capillary electrophoretic separation of anions in dimethylformamide–acetic acid medium
Source: Royal Society of Chemistry journal article supplement (doi:10.1039/c4ay00325j), 2014-01-01
Supplement: c4ay00325j1.pdf [file c4ay00325j1.pdf]

## Supporting Information

Capillary electrophoretic separation of anions in dimethylformamide–acetic acid  
medium

Zhiren Tian, Weidong Qin \*

### 1. Resonance structures of DMFH<sup>+</sup>

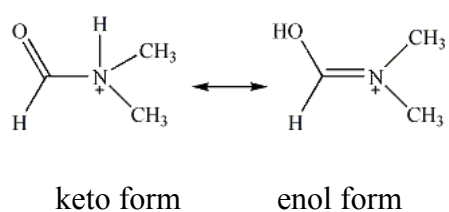

Scheme S1 Resonance structures of DMFH<sup>+</sup>

### 2. Influence of sample solvent

Table S1 Related properties of the solvent studied <sup>1</sup>

|              | Relative permittivity | Polarity | Viscosity<br>(cP) |
|--------------|-----------------------|----------|-------------------|
| Methanol     | 33.0                  | 1.70     | 0.551             |
| Acetonitrile | 36.64                 | 3.92     | 0.341             |
| Sulfolane    | 43.26                 | 4.81     | 9.87              |
| Water        | 78                    | 1.87     | 0.890             |

### 3. Effective length-dependence of the mobility

In this experiment all the parameters were kept identical except that the effective length of capillary was varied from 10 cm to 50 cm by moving the C<sup>4</sup>D detector along

the capillary. The effective mobility of analytes increased with the increasing effective capillary length, suggesting that the ions migrated at lower velocity in the injection plug than in the s-BGE. The results are the consequence of either the higher conductivity of the sample zone or the desolvation/solvation of the solutes, or both.

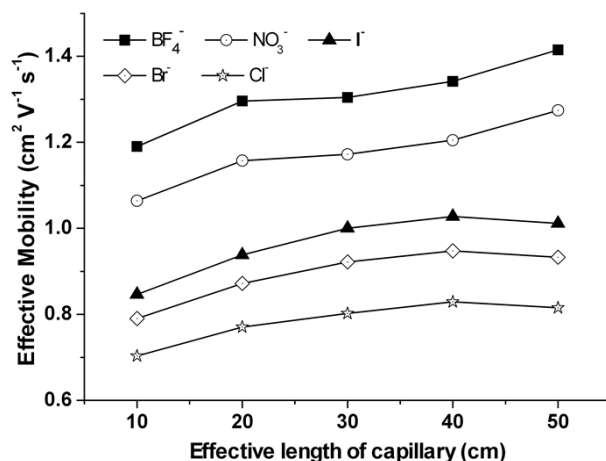

Fig. S1 Variation of effective mobility with effective capillary length  
The BGE: DMF-HAc medium. The capillary: 60 cm, with an effective length of 50 cm. Separation voltage: -14kV.

#### 4. Oscillation voltage of C<sup>4</sup>D

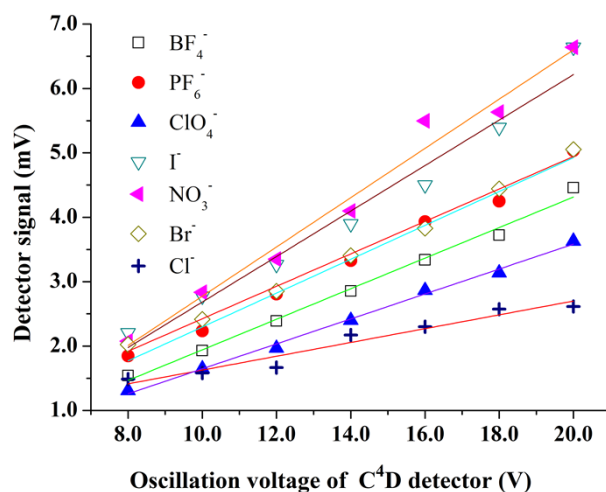

Fig. S2 Influence of oscillation voltage

#### References

1. S. P. Porras, M. L. Riekkola and E. Kenndler, *Electrophoresis*, 2003, **24**, 1485-1498.
